# Supplementary material
Source: PubMed Central journal article supplement (PMC2791055)
Supplement: cvp275_1.pdf [file cvp275_1.pdf]

## Supplemental figure 1

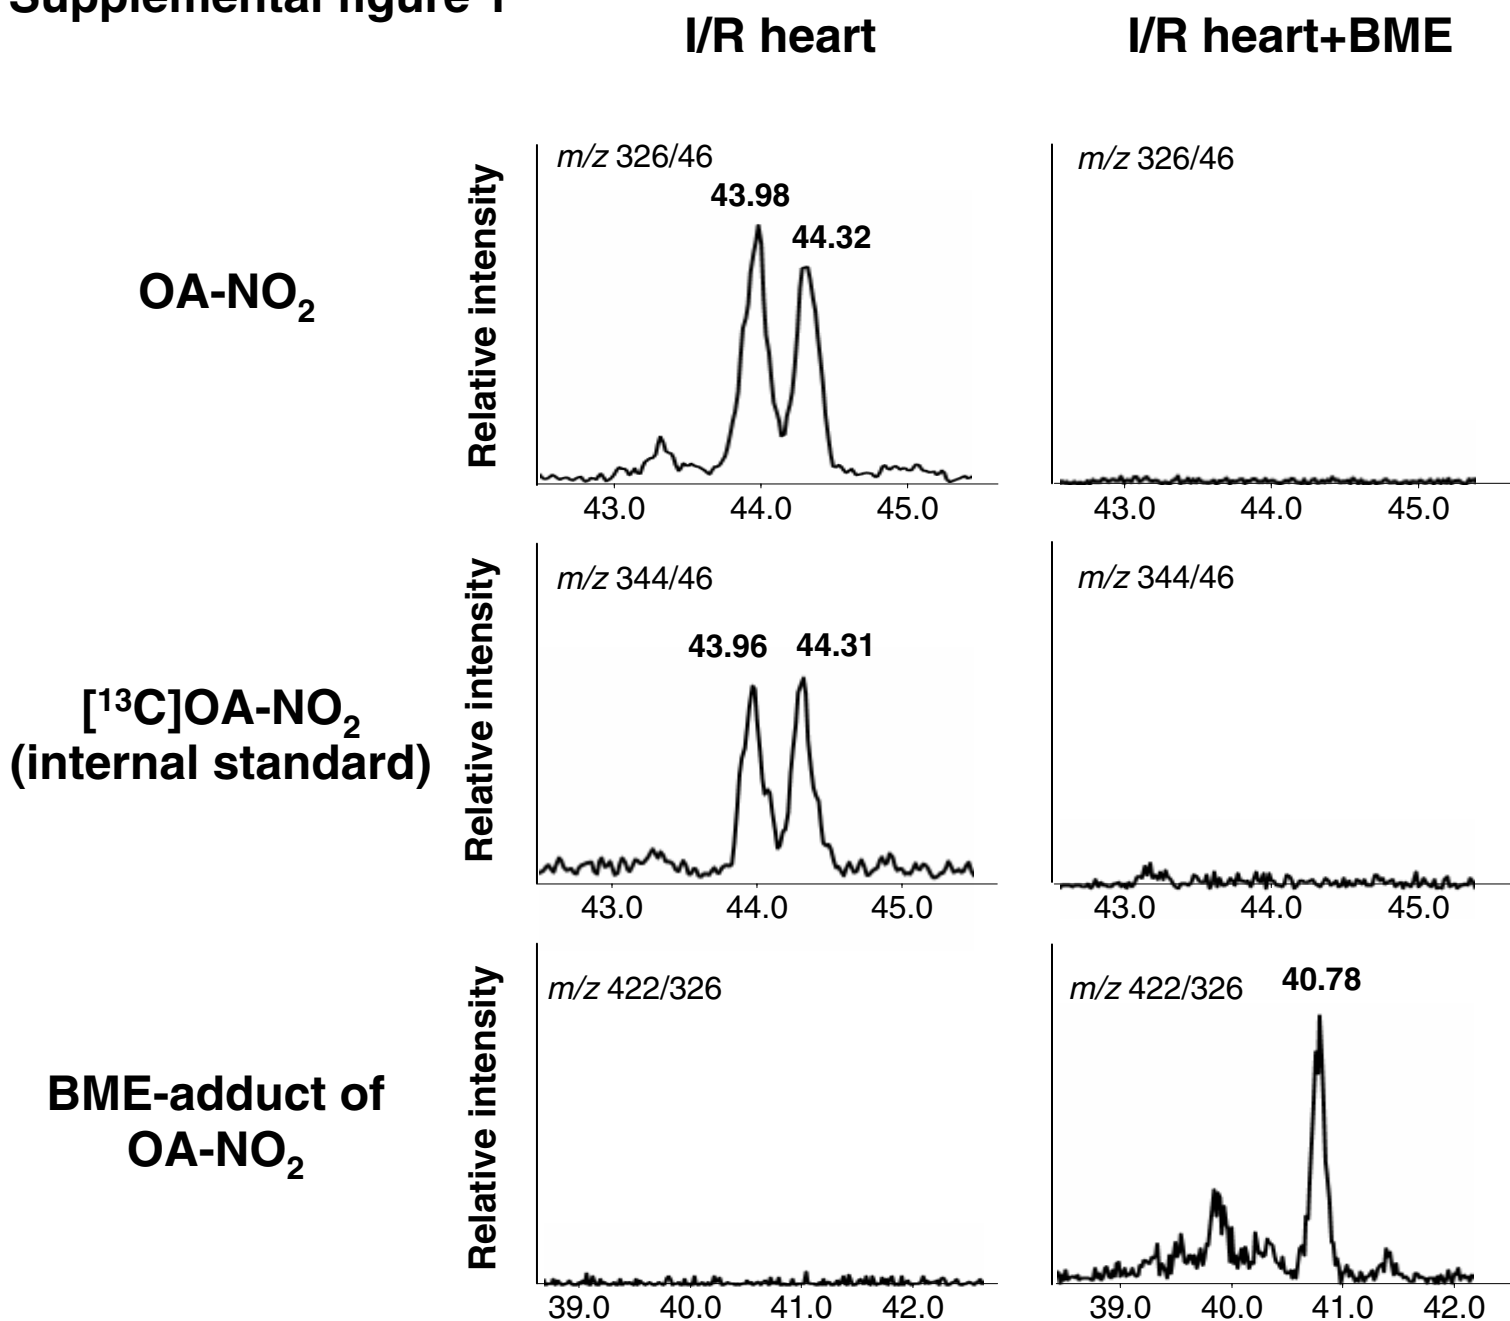

**Assessment of electrophilic properties of OA-NO<sub>2</sub> extracted from heart tissue from mice subjected to I/R injury.** Transitions for OA-NO<sub>2</sub> (top), the corresponding internal standard (middle) and OA-NO<sub>2</sub> adducted to the nucleophile β-mercaptoethanol (BME, bottom) are displayed. All chromatograms are derived from one sample which was obtained by lipid extraction from I/R heart tissue. After lipid extraction the sample was incubated with 500 mM BME for 4 hours at 37°C. After incubation with BME (right column) OA-NO<sub>2</sub> as well as the internal standard are no longer detected in their characteristic transitions. Instead a peak appears in the transition *m/z* 422/326 (mass of OA-NO<sub>2</sub>: 326 amu, neutral loss of BME: 78) confirming adduction of OA-NO<sub>2</sub> to BME and thus the electrophilic activity of OA-NO<sub>2</sub>.
